# Supplementary material for: Outcomes of a Cluster Randomized Controlled Trial of the SoMe Social Media Literacy Program for Improving Body Image-Related Outcomes in Adolescent Boys and Girls
Source: MDPI journal article supplement (doi:10.3390/nu13113825), 2021-10-27
Supplement: s1 [file s1]

# Supplementary table

**Scheme 1.** Mean Change in Study Variables at Post-Intervention and 6- and 12-Month Follow-Up Adjusted for ‘Completers’.

| Adjusted for Completers        |             |               |     |               |                                                   |             |                |
|--------------------------------|-------------|---------------|-----|---------------|---------------------------------------------------|-------------|----------------|
| Outcome                        | Study Group |               |     |               | Difference in change score<br>(Group 1 - Group 0) |             |                |
|                                | n           | M (SD)        | n   | M (SD)        | M (95% CI)                                        | Effect size | p (two-tailed) |
| Primary and secondary outcomes |             |               |     |               |                                                   |             |                |
| Weight/shape concerns          |             |               |     |               |                                                   |             |                |
| Baseline                       | 229         | 1.62 (1.70)   | 254 | 1.46 (1.52)   |                                                   |             |                |
| Post-intervention              | 228         | 1.54 (1.66)   | 257 | 1.31 (1.47)   | -0.07 [-0.25, 0.11]                               | -0.044      | 0.441          |
| 6 month follow-up              | 227         | 1.69 (1.71)   | 256 | 1.60 (1.63)   | 0.08 [-0.13, 0.29]                                | 0.050       | 0.473          |
| 12 month follow-up             | 228         | 1.67 (1.69)   | 256 | 1.76 (1.62)   | 0.23 [-0.01, 0.47]                                | 0.143       | 0.057          |
| State body satisfaction        |             |               |     |               |                                                   |             |                |
| Baseline                       | 229         | 64.75 (32.02) | 249 | 68.44 (29.53) |                                                   |             |                |
| Post-intervention              | 229         | 66.52 (32.34) | 257 | 69.25 (29.41) | -1.07 [-5.02, 2.87]                               | -0.035      | 0.594          |
| 6 month follow-up              | 226         | 67.03 (31.86) | 257 | 67.29 (30.60) | -2.61 [-7.04, 1.82]                               | -0.085      | 0.249          |
| 12 month follow-up             | 228         | 64.88 (31.03) | 255 | 67.25 (29.56) | -0.86 [-5.90, 4.18]                               | -0.028      | 0.738          |
| Dietary restraint              |             |               |     |               |                                                   |             |                |
| Baseline                       | 228         | 1.91 (0.94)   | 257 | 1.87 (0.93)   |                                                   |             |                |
| Post-intervention              | 229         | 1.78 (0.93)   | 259 | 1.72 (0.84)   | -0.02 [-0.13, 0.08]                               | -0.021      | 0.692          |
| 6 month follow-up              | 228         | 1.92 (1.06)   | 257 | 1.84 (0.94)   | -0.05 [-0.20, 0.10]                               | -0.053      | 0.518          |
| 12 month follow-up             | 227         | 1.86 (0.99)   | 257 | 1.90 (1.00)   | 0.07 [-0.09, 0.24]                                | 0.075       | 0.397          |
| Drive to increase muscularity  |             |               |     |               |                                                   |             |                |
| Baseline                       | 229         | 10.82 (5.07)  | 255 | 10.53 (5.22)  |                                                   |             |                |
| Post-intervention              | 230         | 9.66 (4.75)   | 257 | 9.72 (4.87)   | 0.38 [-0.32, 1.08]                                | 0.074       | 0.284          |
| 6 month follow-up              | 229         | 10.15 (4.98)  | 257 | 10.28 (4.72)  | 0.41 [-0.42, 1.25]                                | 0.080       | 0.332          |
| 12 month follow-up             | 229         | 9.52 (4.75)   | 256 | 10.59 (5.06)  | 1.39 [0.44, 2.34]                                 | 0.270       | 0.004          |
| Self-esteem                    |             |               |     |               |                                                   |             |                |
| Baseline                       | 228         | 11.28 (2.95)  | 253 | 11.06 (2.61)  |                                                   |             |                |
| Post-intervention              | 227         | 11.28 (2.97)  | 255 | 10.93 (3.02)  | -0.10 [-0.53, 0.33]                               | -0.036      | 0.655          |
| 6 month follow-up              | 230         | 10.89 (3.12)  | 258 | 11.00 (3.04)  | 0.35 [-0.15, 0.84]                                | 0.126       | 0.174          |
| 12 month follow-up             | 227         | 10.77 (3.25)  | 256 | 10.73 (3.03)  | 0.24 [-0.30, 0.78]                                | 0.086       | 0.384          |
| Depressive symptoms            |             |               |     |               |                                                   |             |                |
| Baseline                       | 226         | 15.83 (6.82)  | 256 | 15.16 (6.84)  |                                                   |             |                |
| Post-intervention              | 230         | 16.13 (7.36)  | 257 | 15.49 (7.14)  | 0.09 [-0.90, 1.08]                                | 0.013       | 0.863          |
| 6 month follow-up              | 230         | 17.79 (8.74)  | 258 | 16.10 (7.56)  | -0.97 [-2.13, 0.19]                               | -0.142      | 0.102          |
| 12 month follow-up             | 228         | 17.74 (8.43)  | 255 | 17.92 (8.17)  | 0.89 [-0.37, 2.16]                                | 0.130       | 0.167          |
| Exploratory outcomes           |             |               |     |               |                                                   |             |                |
| Thin ideal internalization     |             |               |     |               |                                                   |             |                |
| Baseline                       | 229         | 11.70 (5.09)  | 256 | 11.52 (4.87)  |                                                   |             |                |
| Post-intervention              | 228         | 11.77 (4.94)  | 259 | 11.57 (4.66)  | 0.01 [-0.71, 0.73]                                | 0.002       | 0.982          |
| 6 month follow-up              | 226         | 12.38 (5.26)  | 257 | 11.78 (4.83)  | -0.44 [-1.25, 0.38]                               | -0.088      | 0.294          |
| 12 month follow-up             | 228         | 12.25 (5.05)  | 256 | 12.24 (4.74)  | 0.17 [-0.67, 1.01]                                | 0.034       | 0.689          |
| Muscular internalization       |             |               |     |               |                                                   |             |                |
| Baseline                       | 229         | 11.45 (5.47)  | 258 | 11.24 (5.30)  |                                                   |             |                |
| Post-intervention              | 230         | 11.21 (5.68)  | 259 | 10.57 (5.28)  | -0.46 [-1.24, 0.33]                               | -0.085      | 0.255          |
| 6 month follow-up              | 229         | 11.49 (5.71)  | 257 | 11.51 (5.51)  | 0.21 [-0.69, 1.10]                                | 0.039       | 0.653          |
| 12 month follow-up             | 229         | 11.15 (5.58)  | 257 | 12.06 (5.66)  | 1.10 [0.11, 2.10]                                 | 0.204       | 0.03           |
| Upwards appearance comparison  |             |               |     |               |                                                   |             |                |
| Baseline                       | 228         | 11.74 (6.60)  | 256 | 10.83 (6.05)  |                                                   |             |                |

|                    |     |              |     |              |                    |       |       |
|--------------------|-----|--------------|-----|--------------|--------------------|-------|-------|
| Post-intervention  | 228 | 11.22 (6.58) | 258 | 10.57 (5.28) | 0.39 [-0.42, 1.19] | 0.062 | 0.344 |
| 6 month follow-up  | 229 | 12.24 (6.98) | 257 | 11.53 (6.33) | 0.21 [-0.78, 1.19] | 0.033 | 0.679 |
| 12 month follow-up | 228 | 12.43 (6.83) | 257 | 12.27 (6.57) | 0.73 [-0.28, 1.74] | 0.116 | 0.154 |

Effects are based on multiple imputation ( $n = 50$  imputations). Differences compare post-intervention to all other timepoints, adjusted for age, language, and school type.
